# Supplementary material
Source: publisher site journal article supplement (https://www.dovepress.com/article/397054)
Supplement: Supplementary file 1 [file get_supplementary_file.php]

## Supplementary materials

### **Pharmacological ischemic conditioning with roxadustat does not affect pain-like behaviors but mitigates sudomotor impairment in a murine model of deep hind paw incision**

#### **File List :**

1. **Supplementary Table 1** Full details of antibodies used in immunohistochemistry and immunocytochemistry
2. **Supplementary Figure 1** Tissue hypoxia was detected in infiltrated PMNs in the surgical wound.
3. **Supplementary Figure 2** PHD2 was observed in eccrine sweat gland cells of both naïve and operated mice.
4. **Supplementary Figure 3** PIC alone without surgery did not affect ipsilateral hind paw thickness and spontaneous pain-like behaviors.
5. **Supplementary Figure 4** PIC alone without surgery did not affect sudomotor function and paw temperature.
6. **Supplementary Figure 5** PIC alone without surgery did not affect TH-positive sympathetic innervation around the eccrine glands.
7. **Supplementary Video 1–5** 3D reconstruction of TH-positive nerve fibres within and around the eccrine glands in the ipsilateral hind paws.

**Supplementary Table 1** Full details of antibodies used in immunohistochemistry and immunocytochemistry

| Antibody                                                                  | Species | Manufacturer                              | Catalog<br>RRID           | Dilution       |
|---------------------------------------------------------------------------|---------|-------------------------------------------|---------------------------|----------------|
| Anti-pimonidazole antibody                                                | Rabbit  | Cosmobio                                  | HP3-100<br>/              | 1:100          |
| Anti-prolyl hydroxylase 2 (PHD2) antibody                                 | Rabbit  | Novus Biologicals                         | NB100-2219SS<br>AB_791552 | 1:500          |
| Anti-neurofilament heavy (NF-H) antibody                                  | Chicken | Neuromics                                 | CH22104<br>AB_2737101     | 1:5000         |
| Anti-tyrosine hydroxylase (TH) antibody                                   | Chicken | Abcam                                     | Ab76442<br>AB_1524535     | 1:100          |
| Anti-tyrosine hydroxylase (TH) antibody                                   | Rabbit  | Merck                                     | 657012<br>AB_2201407      | 1:500<br>1:100 |
| Anti-lymphocyte antigen 6 complex, locus G + locus C (Ly6G+Ly6C) antibody | Rat     | Arigo Biolaboratories                     | ARG22104<br>/             | 1:100          |
| Anti-aquaporin (AQP) 5 antibody, Alexa Fluor 488                          | Rabbit  | Bioss Antibodies Inc.                     | bs-1554R-A488<br>/        | 1:100          |
| Anti-hypoxia inducible factor (HIF) 1 alpha antibody                      | Rabbit  | GeneTex                                   | GTX127309<br>AB_2616089   | 1:100          |
| Anti-rabbit Alexa Fluor 594                                               | Goat    | Thermo Fisher Scientific                  | A11037<br>AB_2534095      | 1:500          |
| Anti-chicken Alexa Fluor 594                                              | Goat    | Jackson ImmunoResearch Laboratories, Inc. | 103-545-155<br>AB_2337390 | 1:500          |
| Anti-rat Alexa Fluor 488                                                  | Donkey  | Jackson ImmunoResearch Laboratories, Inc. | 712-545-153<br>AB_2340684 | 1:500          |
| Anti-rabbit Alexa Fluor 594                                               | Donkey  | Jackson ImmunoResearch Laboratories, Inc. | 711-585-152<br>AB_2340621 | 1:500          |

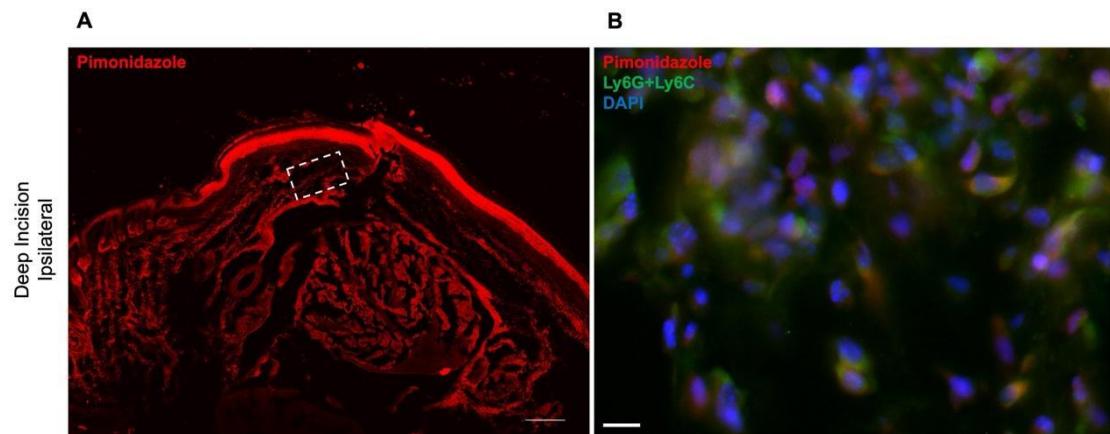

**Supplementary Figure 1** Tissue hypoxia was detected in infiltrated polymorphonuclear neutrophils in the surgical wound.

**Note:** (A) Representative images of deep-incised paw sections stained with pimonidazole on POD 1, indicating the location of infiltrating immune cells (dashed boxes) in the wound. Scale bar = 200  $\mu\text{m}$ . (B) Representative confocal microscopy images displaying the colocalization of pimonidazole/Ly6G+Ly6C/DAPI in the polymorphonuclear neutrophils on POD1. Scale bar: 10  $\mu\text{m}$ .

**Abbreviations:** Ly6G+Ly6C, lymphocyte antigen 6 complex, locus G + locus C; POD, postoperative day.

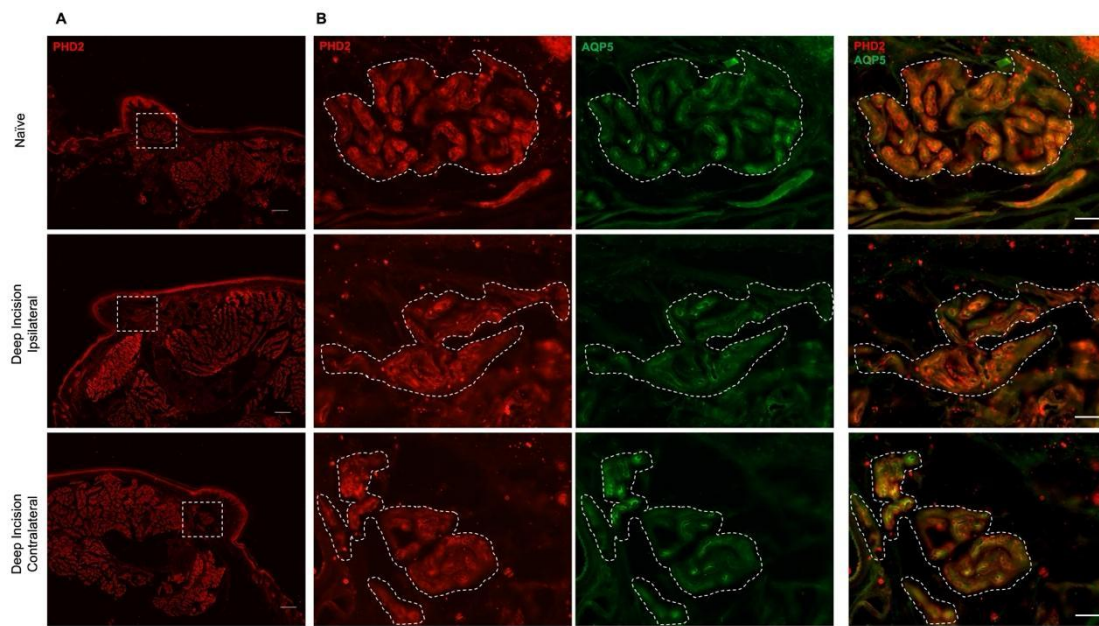

**Supplementary Figure 2** PHD2 was observed in eccrine sweat gland cells of both naïve and operated mice.

**Note:** (A) Representative images of paw sections stained with PHD2 on POD 1 indicating the location of eccrine glands (dashed boxes). Scale bar = 200  $\mu$ m. (B) Representative images of eccrine glands (dashed lines) stained for PHD2 and AQP5 on POD1. Scale bar = 50  $\mu$ m.

**Abbreviations:** PHD2, prolyl hydroxylase domain protein 2; AQP5, aquaporin 5; POD, postoperative day.

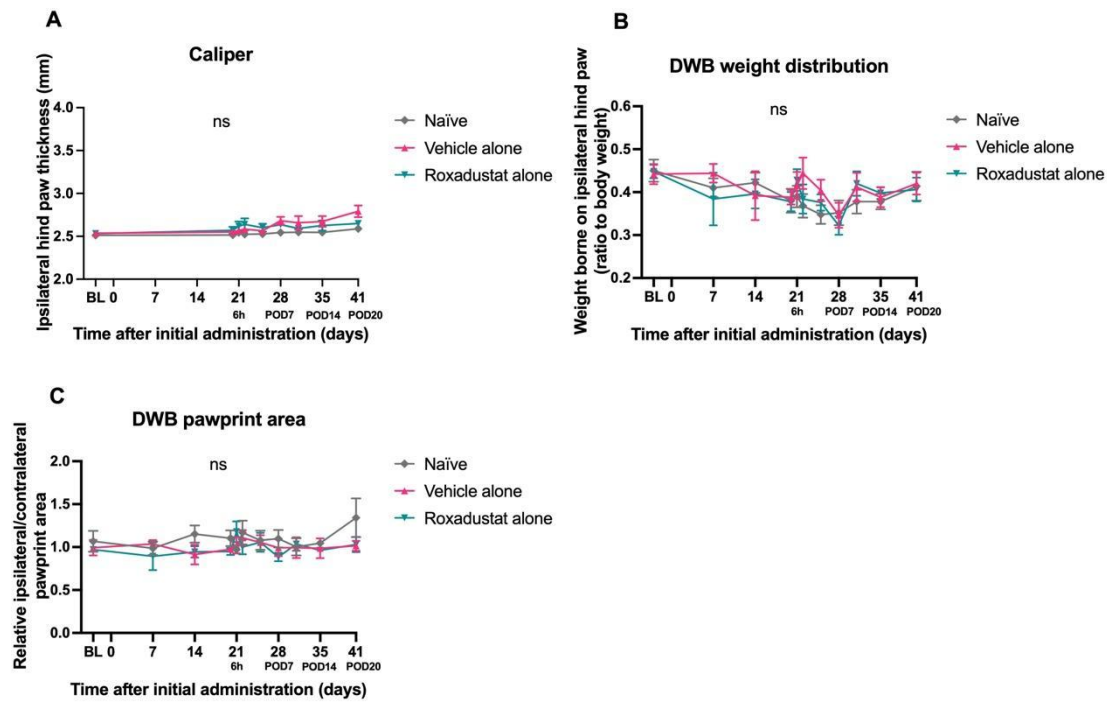

**Supplementary Figure 3** PIC alone without surgery did not affect ipsilateral hind paw thickness and spontaneous pain-like behaviors.

**Note:** Changes in ipsilateral hind paw thickness (A), weight distribution ratio of the ipsilateral paw to the total body weight (B) and paw print area ratio of the ipsilateral paw to the contralateral paw (C) of naïve and vehicle- or roxadustat-treated mice from BL to day 41 ( $n = 19$  per group). Data are expressed as mean  $\pm$  SEM, assessed by two-way ANOVA with Šídák's multiple comparisons test.

**Abbreviations:** BL, baseline; POD, postoperative day; ns, not significant; DWB, dynamic weight-bearing; PIC, pharmacological ischemic conditioning.

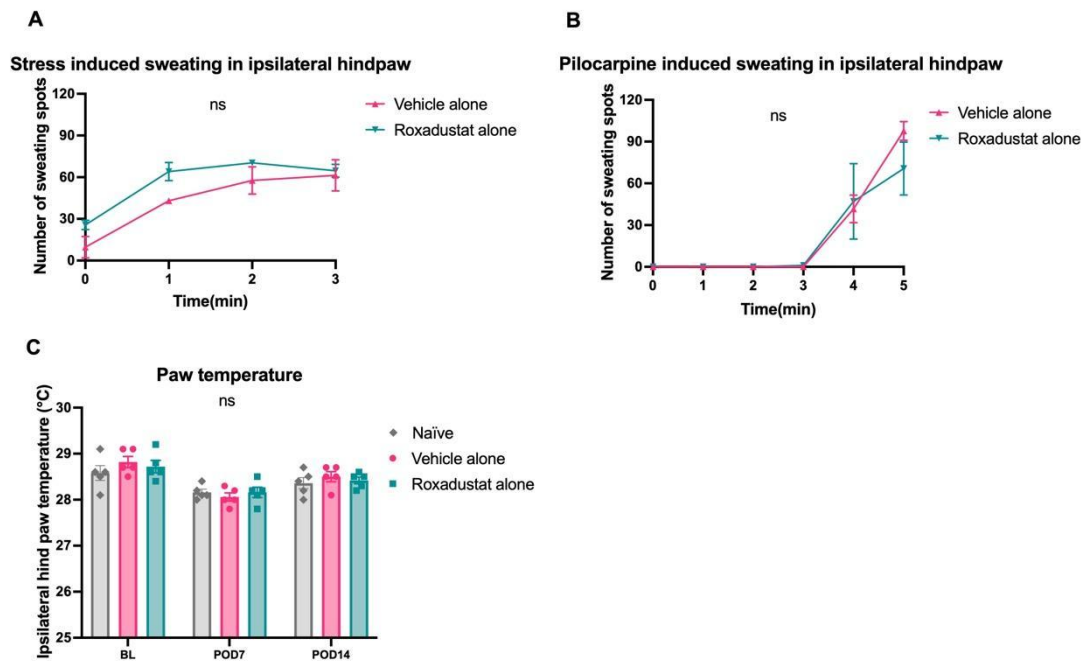

**Supplementary Figure 4** Pharmacological ischemic conditioning (PIC) alone without surgery did not affect sudomotor function and paw temperature.

**Note:** (A) Quantification of restraint stress-induced sweating of vehicle- or roxadustat-treated mice on day 41 (n = 5 per group). (B) Quantification of pilocarpine-induced sweating of vehicle- or roxadustat-treated mice on day 42 (n = 5 per group). (C) Ipsilateral hind paw temperature of naïve and vehicle- or roxadustat-treated mice at BL, on POD 7 and on POD14 (n = 5 per group). Data are expressed as mean ± SEM, assessed by two-way ANOVA with repeated measures followed by Šídák's multiple comparisons test.

**Abbreviations:** BL, baseline; POD, postoperative day; ns, not significant; PIC, pharmacological ischemic conditioning

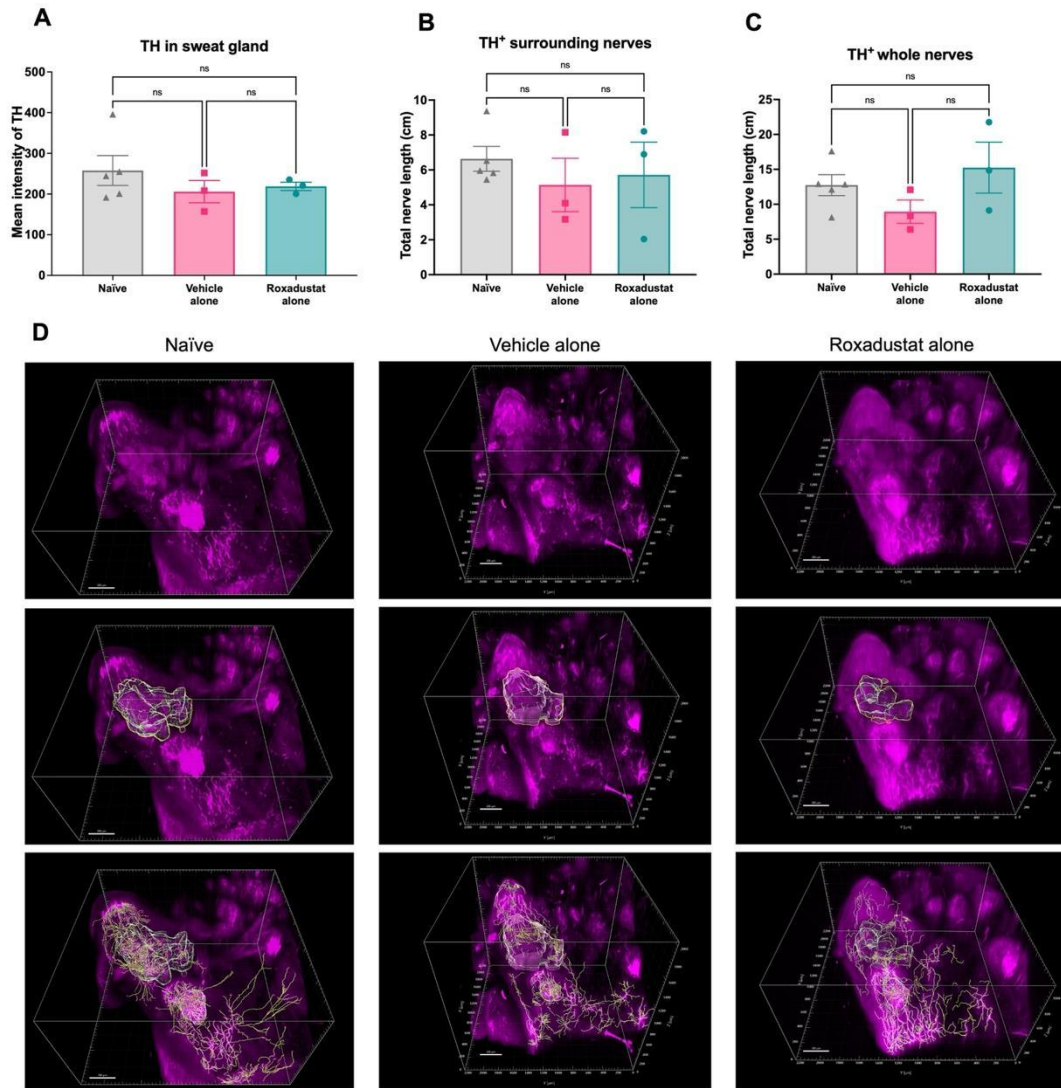

**Supplementary Figure 5** PIC alone without surgery did not affect TH-positive sympathetic innervation around the eccrine glands.

**Note:** (A) Mean intensity of TH immunoreactivity in the eccrine glands in the ipsilateral hind paws (n = 3–5 per group). Total length of TH-positive nerve fibres surrounding (B) and within and around (C) the eccrine glands in the ipsilateral hind paws of naïve and vehicle- or roxadustat-treated mice (n = 3–5 per group) on day 42. (D) Representative images of skin samples adjacent to the surgical wound from ipsilateral hind paws with AbSca/e labeling of TH. Upper panels display stacked images without 3D rendering. Middle panels display stacked images with 3D rendering of the main eccrine glands. Bottom panels display stacked images with 3D rendering of the main eccrine glands and TH-positive nerve fibres within and around the eccrine glands. Scale bar = 300  $\mu$ m. Data are expressed as mean  $\pm$  SEM, assessed by one-way ANOVA with Tukey's multiple comparisons test.

**Abbreviations:** TH, tyrosine hydroxylase; ns, not significant; PIC, pharmacological ischemic conditioning.

### **Supplementary Videos**

3D reconstruction of TH-positive nerve fibres within and around the eccrine glands in the ipsilateral hind paws of naïve (Supplementary Video 1), deep incision + vehicle (Supplementary Video 2), deep incision + roxadustat (Supplementary Video 3), roxadustat alone (Supplementary Video 4), and vehicle alone (Supplementary Video 5) mice on day 42 (POD21). Scale bar = 300  $\mu\text{m}$ .
